# Supplementary material for: HNMT Upregulation Induces Cancer Stem Cell Formation and Confers Protection against Oxidative Stress through Interaction with HER2 in Non-Small-Cell Lung Cancer
Source: MDPI journal article supplement (doi:10.3390/ijms23031663), 2022-01-31
Supplement: s1 [file s1]

## SUPPLEMENTARY INFORMATION

### **HNMT Upregulation Induces Cancer Stem Cell Formation and Confers Protection Against Oxidative Stress Through Interaction with HER2 in Non-Small-Cell Lung Cancer**

Kuang-Tai Kuo<sup>1,2</sup>, Cheng-Hsin Lin<sup>3,4,5</sup>, Chun-Hua Wang<sup>6,7</sup>, Narpati Wesa Pikatan<sup>8</sup>, Vijesh Kumar Yadav<sup>9</sup>, Iat-Hang Fong<sup>9</sup>, Chi-Tai Yeh<sup>9,10\*</sup>, Wei-Hwa Lee<sup>11</sup>, Wen-Chien Huang<sup>12,13\*</sup>

<sup>1</sup> Division of Thoracic Surgery, Department of Surgery, School of Medicine, College of Medicine, Taipei Medical University, Taipei 110, Taiwan

<sup>2</sup> Division of Thoracic Surgery, Department of Surgery, Taipei Medical University—Shuang Ho Hospital, New Taipei City 235, Taiwan.

<sup>3</sup> Taipei Heart Institute, Taipei Medical University, Taipei, Taiwan; chlin99025@tmu.edu.tw

<sup>4</sup> Division of Cardiovascular Surgery, Department of Surgery, Shuang Ho Hospital, Taipei Medical University, New Taipei City, Taiwan.

<sup>5</sup> Division of Cardiovascular Surgery, Department of Surgery, School of Medicine, College of Medicine, Taipei Medical University, Taipei, Taiwan.

<sup>6</sup> Department of Dermatology, Taipei Tzu Chi Hospital, Buddhist Tzu Chi Medical Foundation, New Taipei City, 231, Taiwan; 10205@s.tmu.edu.tw

<sup>7</sup> School of Medicine, Buddhist Tzu Chi University, Hualien 970, Taiwan

<sup>8</sup> Division of Urology, Department of Surgery, Faculty of Medicine, Universitas Gadjah Mada/Dr. Sardjito Hospital, Yogyakarta, 55281, Indonesia; narpatiwp@gmail.com

<sup>9</sup> Department of Medical Research & Education, Taipei Medical University—Shuang Ho Hospital, New Taipei City 235, Taiwan; ctyeh@s.tmu.edu.tw

<sup>10</sup> Department of Medical Laboratory Science and Biotechnology, Yuanpei University of Medical Technology, Hsinchu 300, Taiwan

<sup>11</sup> Department of Pathology, Taipei Medical University—Shuang Ho Hospital, New Taipei City 235, Taiwan; whlpath97616@s.tmu.edu.tw

<sup>12</sup> Department of Medicine, MacKay Medical College, New Taipei City 252, Taiwan; wjhuang0@gmail.com

<sup>13</sup> Division of Thoracic Surgery, Department of Surgery, MacKay Memorial Hospital, Taipei 104, Taiwan

**Correspondence:** Corresponding Author Chi-Tai Yeh, MD., PhD, Department of Medical Research, Taipei Medical University-Shuang Ho Hospital, New Taipei City, Taiwan; Department of Pathology, Taipei Medical University-Shuang Ho Hospital, Taipei, Taiwan. Phone: 886-2-2490088 ext. 8881; FAX: 886-2-2248-0900 E-mail: [ctyeh@s.tmu.edu.tw](mailto:ctyeh@s.tmu.edu.tw); Wen-Chien Huang, MD., Ph.D, Division of Thoracic Surgery, Department of Surgery, MacKay Memorial Hospital, Taipei 104, Taiwan; Phone: 886-2-2490088 ext. 2919. FAX: 886-2-2248-0900, E-mail: [wjhuang0@gmail.com](mailto:wjhuang0@gmail.com)

Table S1: Primary antibodies of Western blots.

| No. | Target         | Dilution | MW (kDa) | Source     |                |
|-----|----------------|----------|----------|------------|----------------|
| 1   | HER2           | 1:1000   | 185      | #4290      | Cell Signaling |
| 2   | p-HER2         | 1:1000   | 185      | #6942      | Cell Signaling |
| 3   | HER3           | 1:1000   | 185      | #12708     | Cell Signaling |
| 4   | Vimentin       | 1:1000   | 57       | #5741      | Cell Signaling |
| 5   | N-Cadherin     | 1:1000   | 140      | #13116     | Cell Signaling |
| 6   | KLF4           | 1:1000   | 60       | ab129473   | Abcam          |
| 7   | NANOG          | 1:1000   | 37       | ab109250   | Abcam          |
| 8   | OCT4           | 1:1000   | 45       | ab200834   | Abcam          |
| 9   | CD133          | 1:1000   | 110      | ab222782   | Abcam          |
| 10  | Nrf2           | 1:1000   | 85       | ab62352    | Abcam          |
| 11  | HO-1           | 1:1000   | 33       | ab52947    | Abcam          |
| 12  | HNMT           | 1:1000   | 33       | 11874-1-AP | Thermofisher   |
| 13  | $\beta$ -actin | 1:10000  | 42       | 66009-1-Ig | proteintect    |

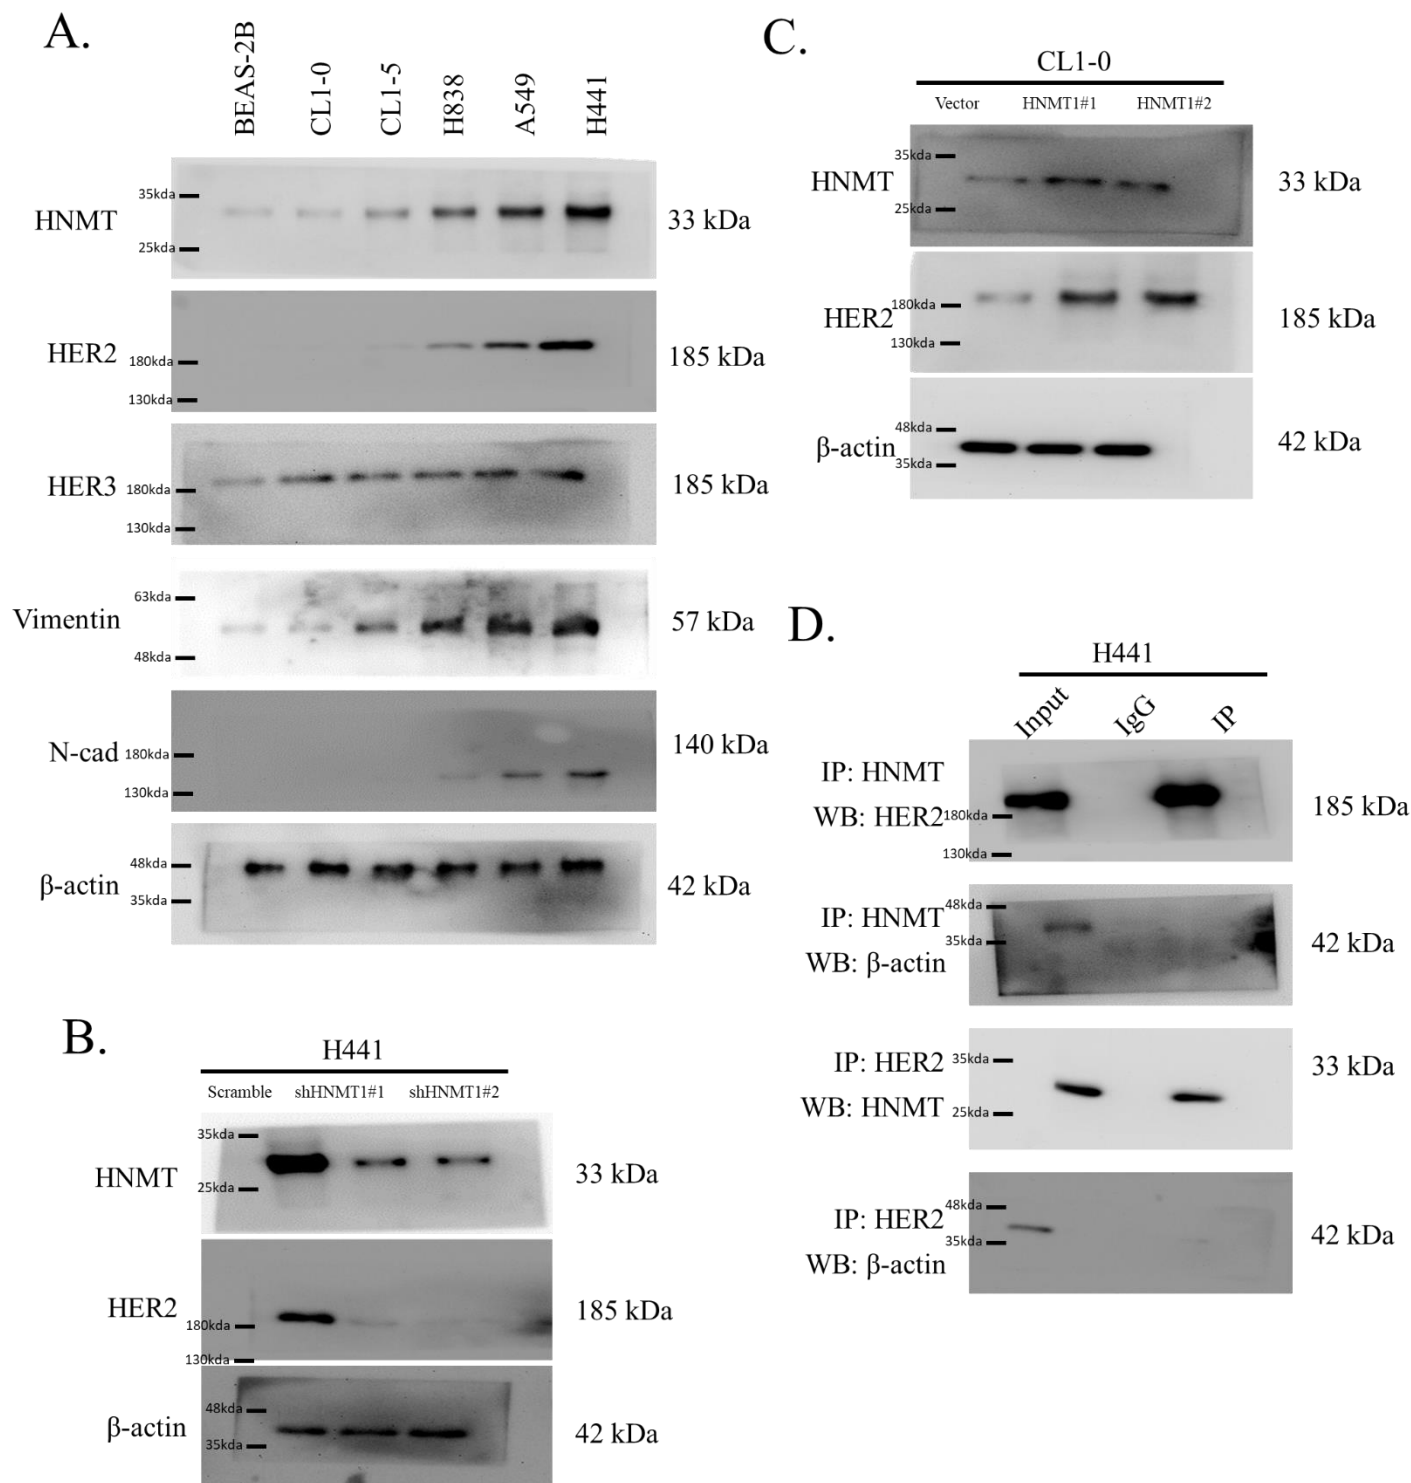

**Supplementary Figure S1. Full-size blots of Figure 2.**

**A, B, C and D**

C.

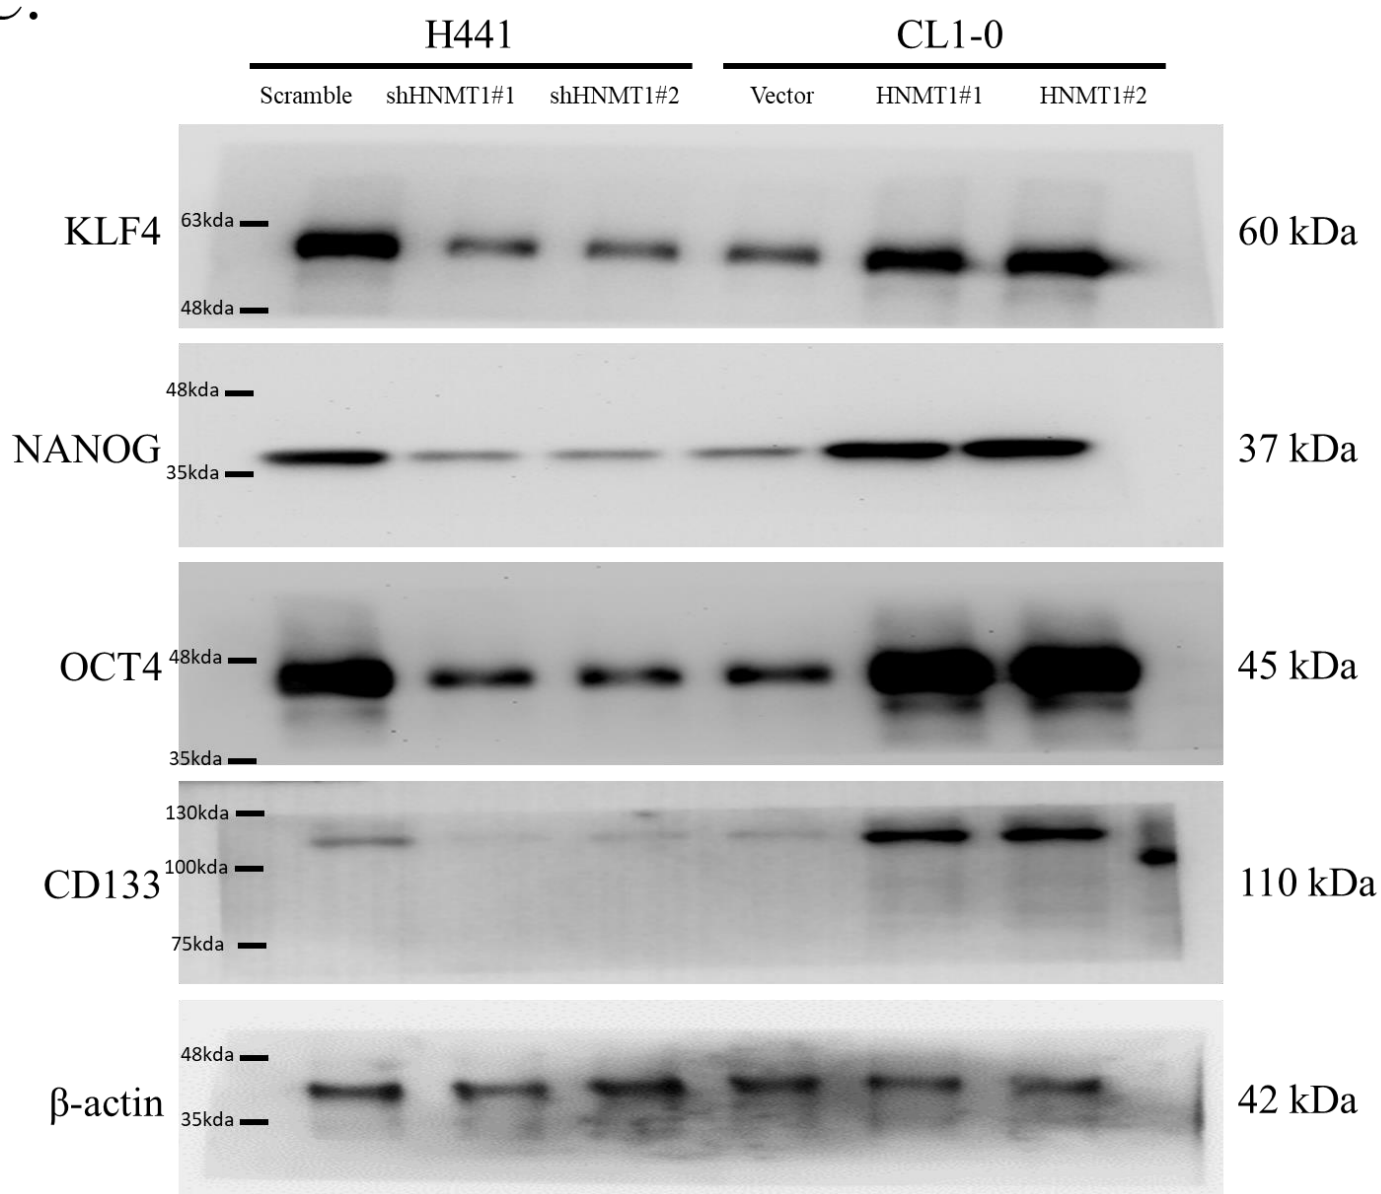

**Supplementary Figure S2. Full-size blots of Figure 3C**

E.

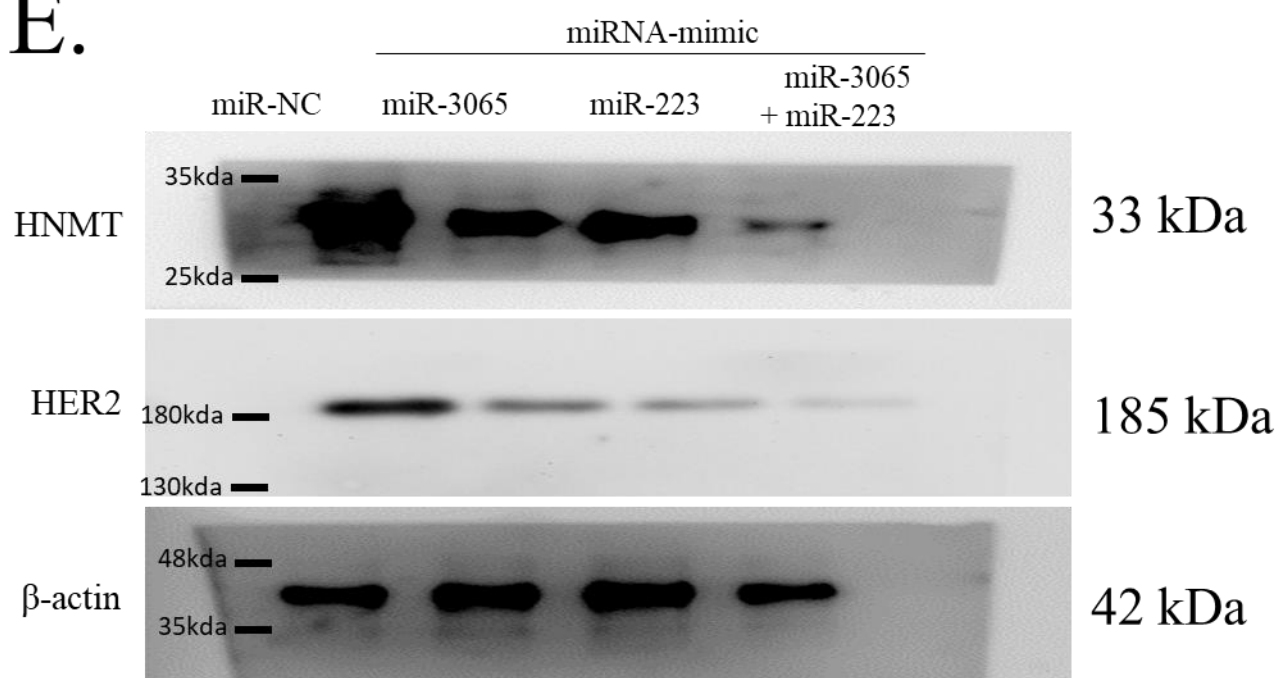

**Supplementary Figure S3. Full-size blots of Figure 4E**

**B.**

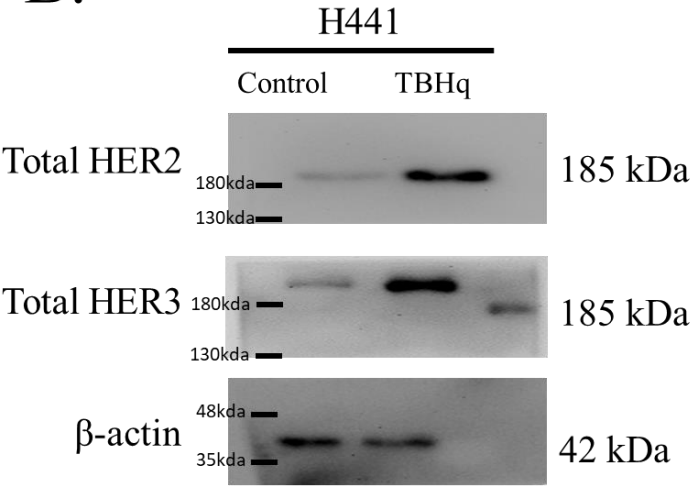

**D.**

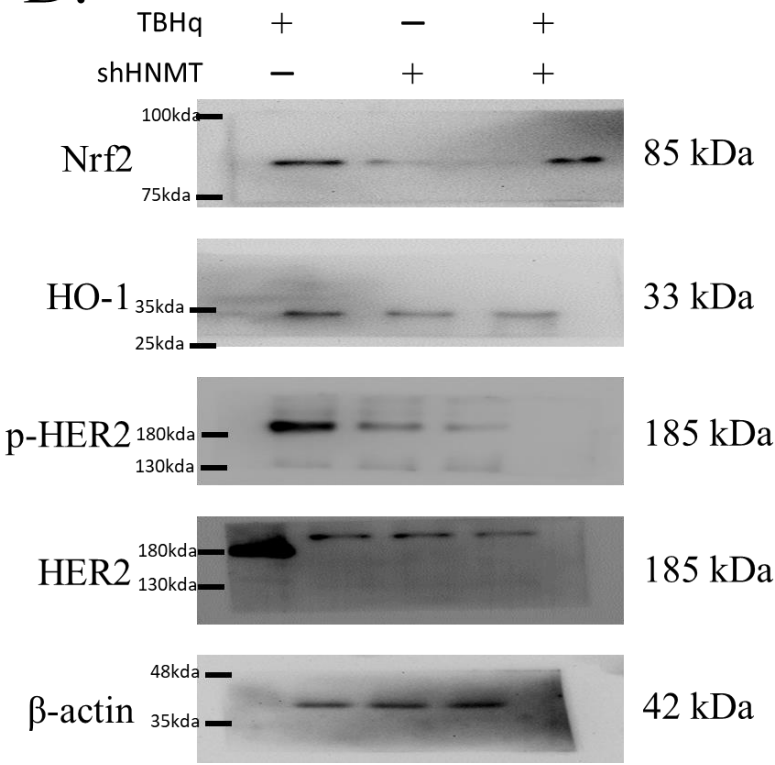

**Supplementary Figure S4. Full-size blots of Figure 5B & 5D.**
